# Supplementary material
Source: PubMed Central journal article supplement (PMC3121916)
Supplement: NIHMS273220-supplement-supplement_1.pdf [file NIHMS273220-supplement-supplement_1.pdf]

**Table S1. Proteins regulated by YB-1 based on Kinex™ antibody microarray analysis**

| Target Protein Name | Phospho Site (Human) | % CFC* | Target Protein Name | Phospho Site (Human) | % CFC* |
|---------------------|----------------------|--------|---------------------|----------------------|--------|
| LIMK1/2             | Y507+T508/Y504+T505  | 365    | CASK/Lin2           | Pan-specific         | -97    |
| RSK1/2              | S380/S386            | 269    | GFAP                | S8                   | -86    |
| ZAP70               | Y315+Y319            | 230    | CASP4               | Pan-specific         | -85    |
| PKA Cb              | S338                 | 198    | 4E-BP1              | S65                  | -85    |
| ErbB2 (HER2)        | Y1248                | 196    | Axl                 | Pan-specific         | -85    |
| Arrestin b1         | Pan-specific         | 192    | CAMK2d              | Pan-specific         | -83    |
| Src                 | Y529                 | 177    | CK1g2               | Pan-specific         | -83    |
| GSK3a/b             | Y279/ Y216           | 177    | STAT3               | Pan-specific         | -82    |
| Mnk1                | T209+T214            | 174    | CASP12              | Pan-specific         | -82    |
| IKKg/NEMO           | Pan-specific         | 167    | Caveolin 2          | S23                  | -81    |
| CDK1/2              | Y15                  | 161    | CaMK1d              | Pan-specific         | -77    |
| AMPKb               | Pan-specific         | 157    | CAMK2b              | Pan-specific         | -73    |
| Paxillin            | Pan-specific         | 154    | CASP7               | Pan-specific         | -73    |
| MARK                | Pan-specific         | 149    | Trail               | Pan-specific         | -72    |
| HspBP1              | Pan-specific         | 149    | FGFR2               | Pan-specific         | -72    |
| PKC-nu (PKN3)       | Pan-specific         | 149    | ANKRD3              | Pan-specific         | -69    |
| Cdc34               | Pan-specific         | 148    | Erk4                | Pan-specific         | -68    |
| Tau                 | S716                 | 148    | PARP1               | Pan-specific         | -68    |
| eIF4E               | Pan-specific         | 142    | PKA Ca/b            | Pan-specific         | -67    |
| Cofilin             | Pan-specific         | 135    | PKBa (Akt1)         | S473                 | -66    |
| PKCd                | S664                 | 125    | p38g MAPK (Erk6)    | Pan-specific         | -66    |
| p53                 | Pan-specific         | 118    | STAT5A              | Pan-specific         | -65    |
| CDK9                | Pan-specific         | 116    |                     |                      |        |
| PKR1                | T451                 | 115    |                     |                      |        |
| PP4/A'2             | Pan-specific         | 114    |                     |                      |        |
| PKR1                | Pan-specific         | 112    |                     |                      |        |
| Vrk1                | Pan-specific         | 111    |                     |                      |        |
| PI3K                | Pan-specific         | 109    |                     |                      |        |
| PTEN                | Pan-specific         | 103    |                     |                      |        |
| ZIPK                | Pan-specific         | 103    |                     |                      |        |
| ZAP70               | Y292                 | 102    |                     |                      |        |
| PP2A/Aa/b           | Pan-specific         | 102    |                     |                      |        |
| PKCq                | Pan-specific         | 101    |                     |                      |        |
| CDK6                | Pan-specific         | 98     |                     |                      |        |

\* %CFC refers to the percent change from control (uninduced HTRY cells)

**Table S2. List of antibodies, dilutions, and suppliers used for immunoblotting (IB) and immunofluorescence (IF)**

| <b>Antibody</b>                | <b>Dilution</b>          | <b>Supplier</b> |
|--------------------------------|--------------------------|-----------------|
| Pan-actin                      | 1:1000                   | Cell Signaling  |
| $\alpha$ -tubulin              | 1:200                    | Abcam           |
| CDK2                           | 1:1000                   | Cell Signaling  |
| Cenexin1                       | 1:100                    | Abcam           |
| CNTROB                         | 1:100                    | Abcam           |
| Cyclin E (clone HE12)          | 1:1000                   | Millipore       |
| EGFR                           | 1:1000                   | StressGen       |
| FLAG M2                        | 1:2000 (IB); 1:1000 (IF) | Sigma           |
| HER2                           | 1:200                    | Abcam           |
| pHistone H3 (S10)              | 1:100                    | Cell Signaling  |
| LIMK1                          | 1:1000                   | Abcam           |
| pLIMK1/2 <sup>T508/T505</sup>  | 1:1000 (IB); 1:20 (IF)   | Santa Cruz      |
| p27 <sup>Kip1</sup> (C-19)     | 1:1000                   | Santa Cruz      |
| p53 (DO-1)                     | 1:100                    | Santa Cruz      |
| Pericentrin                    | 1:500 (IB); 1:250 (IF)   | Abcam           |
| Phalloidin (AF488-conjugate)   | 1:100                    | Invitrogen      |
| PLK1                           | 1:100                    | Sigma           |
| RSK1                           | 1:1000                   | Santa Cruz      |
| RSK2                           | 1:500                    | Santa Cruz      |
| RSK1/2/3                       | 1:1000                   | Cell Signaling  |
| pRSK <sup>S380</sup>           | 1:1000                   | Cell Signaling  |
| $\gamma$ -tubulin (clone D-10) | 1:1000 (IB); 1:50 (IF)   | Santa Cruz      |
| YB-1                           | 1:2000                   | Cell Signaling  |
| pYB-1 <sup>S102</sup>          | 1:1000 (IB); 1:200 (IF)  | Cell Signaling  |
| Vinculin                       | 1:1000                   | Upstate         |

**Table S3. siRNA target sequences**

| <b>siRNA</b> | <b>siRNA target sequence</b>                  | <b>Manufacturer</b> |
|--------------|-----------------------------------------------|---------------------|
| RSK1         | CCCAACATCATCACTCTGAAA                         | Qiagen              |
| RSK2         | AGCGCTGAGAATGGACAGCAA                         | Qiagen              |
| YB-1 #1      | CCACGCAATTACCAGCAAA                           | Dharmacon           |
| YB-1 #2      | Hs_YBX1_1_HP Validated siRNA<br>(#SI03019191) | Qiagen              |
| Scrambled    | AATTCTCCGAACGTGTCACGT                         | Qiagen              |
